# Supplementary material for: A dicopper(i)-dimesoionic carbene complex as a click catalyst: mechanistic implications
Source: Royal Society of Chemistry journal article supplement (doi:10.1039/c9dt01882d), 2019-01-01
Supplement: c9dt01882d1.pdf [file c9dt01882d1.pdf]

## A Dicopper(I)-Dimesoionic Carbene Complex as a Click Catalyst: Mechanistic Implications

Julia Beerhues,<sup>a</sup> Kevin Fauché,<sup>b</sup> Federico Cisnetti,<sup>b</sup> Biprajit Sarkar,<sup>\*a</sup> Arnaud Gautier<sup>\*b</sup>

### Abstract:

A dimesoionic carbene and acetate-bridged dicopper(I) complex is synthesized and fully characterized. This complex is a potent pre-catalyst for the azide-alkyne cycloaddition reaction. A full kinetic investigation shows a first order in azide and a catalyst order inferior to one due to an equilibrated dimerization of the catalyst.

## Table of contents.

|                                                                             |    |
|-----------------------------------------------------------------------------|----|
| Experimental Section.....                                                   | 2  |
| NMR Spectra.....                                                            | 3  |
| Single-Crystal X-Ray Diffraction Data & Crystal Structure. ....             | 5  |
| Catalysis.....                                                              | 9  |
| Substrate Scope & Screening. ....                                           | 9  |
| Rate low.....                                                               | 11 |
| Re-calculation of the kinetics curves using calculated k and Ke values..... | 12 |

## Experimental Section

### NMR Spectra.

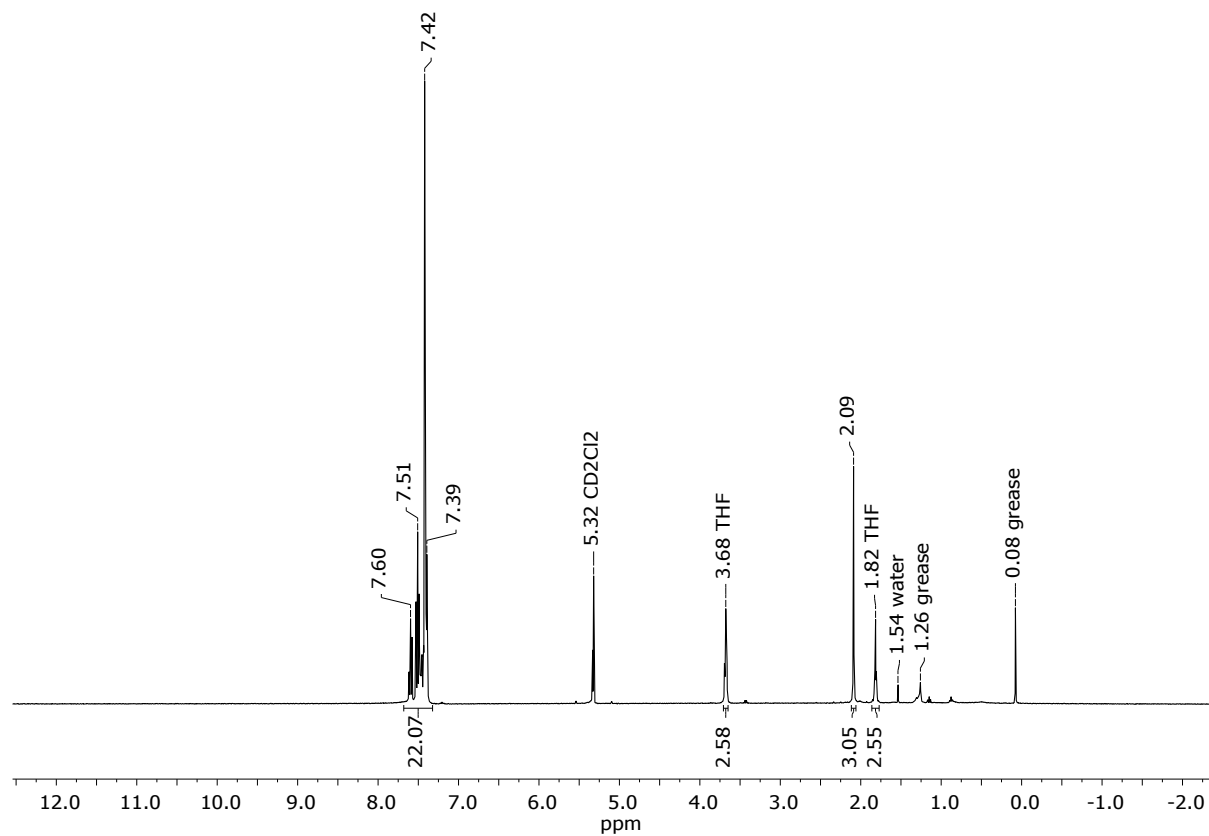

Figure S3: <sup>1</sup>H NMR spectrum of [1]OTf in CD<sub>2</sub>Cl<sub>2</sub>.

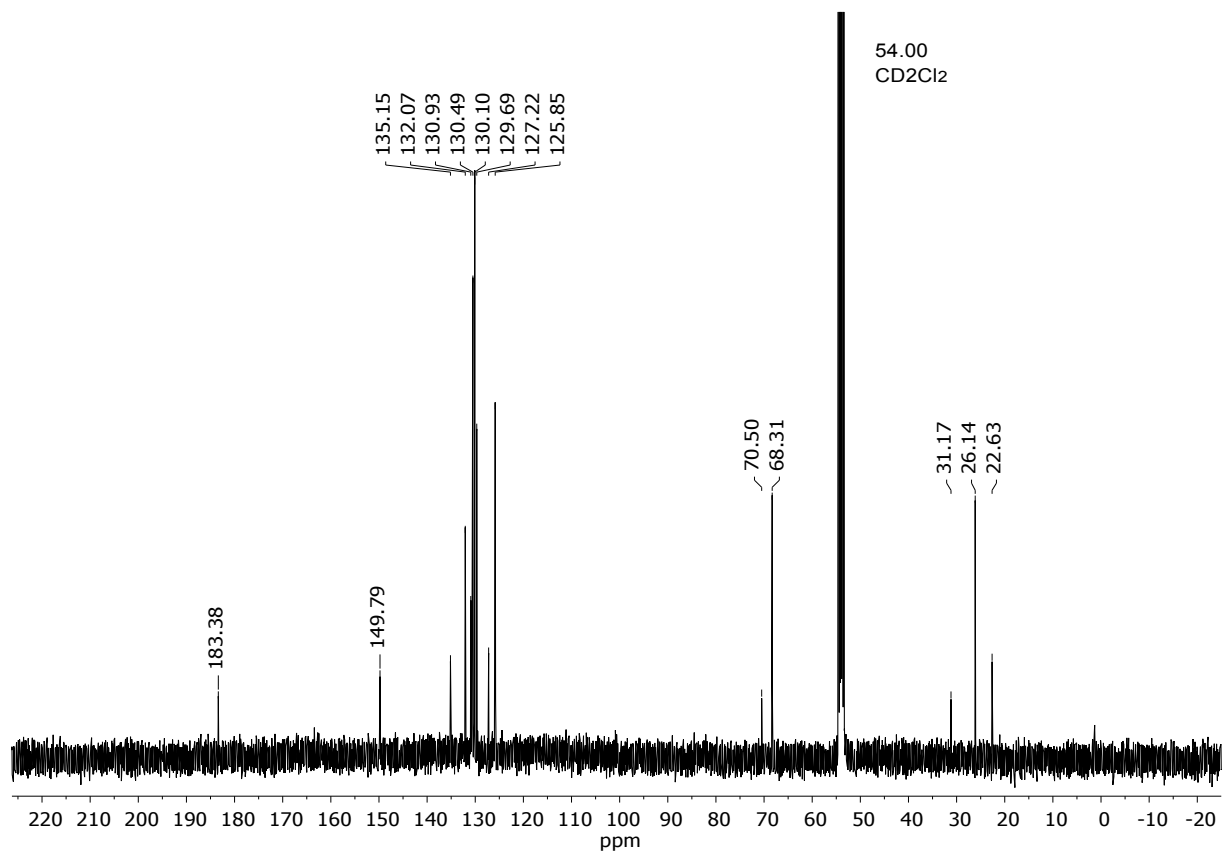

Figure S4: <sup>13</sup>C NMR spectrum of [1]OTf in CD<sub>2</sub>Cl<sub>2</sub>.

## Single-Crystal X-Ray Diffraction Data & Crystal Structure.

Table S5: Crystallographic details for [1]OTf.

|                                                                                                                         | [[1]OTf · 0.5 CH <sub>2</sub> Cl <sub>2</sub> , Pentane] |
|-------------------------------------------------------------------------------------------------------------------------|----------------------------------------------------------|
| Chemical formula                                                                                                        | C32.50 H26 Cl Cu2 F3 N6 O5 S                             |
| <i>Mr</i>                                                                                                               | 832.18                                                   |
| Crystal system                                                                                                          | Orthorhombic, Pca2 <sub>1</sub>                          |
| Space group                                                                                                             |                                                          |
| <i>a</i> (Å)                                                                                                            | 19.1009(15)                                              |
| <i>b</i> (Å)                                                                                                            | 18.6389(13)                                              |
| <i>c</i> (Å)                                                                                                            | 20.5642(15)                                              |
| $\alpha$ (°)                                                                                                            | 90                                                       |
| $\beta$ (°)                                                                                                             | 90                                                       |
| $\gamma$ (°)                                                                                                            | 90                                                       |
| <i>V</i> (Å <sup>3</sup> )                                                                                              | 7321.3(9)                                                |
| <i>Z</i>                                                                                                                | 8                                                        |
| Density (g cm <sup>-3</sup> )                                                                                           | 1.510                                                    |
| <i>F</i> (000)                                                                                                          | 3368                                                     |
| Radiation Type                                                                                                          | Mo K $\alpha$                                            |
| $\mu$ (mm <sup>-1</sup> )                                                                                               | 1.354                                                    |
| Crystal size                                                                                                            | 0.50 x 0.01 x 0.01                                       |
| Meas. Refl.                                                                                                             | 83594                                                    |
| Indep. Refl.                                                                                                            | 13047                                                    |
| Obsvd. [ <i>I</i> > 2 $\sigma$ ( <i>I</i> )] refl.                                                                      | 11969                                                    |
| <i>R</i> <sub>int</sub>                                                                                                 | 0.0340                                                   |
| <i>R</i> [ <i>F</i> <sup>2</sup> > 2 $\sigma$ ( <i>F</i> <sup>2</sup> )], <i>wR</i> ( <i>F</i> <sup>2</sup> ), <i>S</i> | 0.0349, 0.0992, 1.033                                    |
| $\Delta\rho$ <sub>max</sub> , $\Delta\rho$ <sub>min</sub> (e Å <sup>-3</sup> )                                          | 0.682, -0.715                                            |

Table S6: Selected bond lengths (Å) and angles (°) for [1]OTf.

| Atoms        | [1 · 0.5 CH <sub>2</sub> Cl <sub>2</sub> , Pentane] |
|--------------|-----------------------------------------------------|
| Bond lengths |                                                     |
| Cu1-Cu2      | 2.7608(8)                                           |
| Cu1-C1       | 1.867(4)                                            |
| Cu2-C16      | 1.871(5)                                            |
| Cu1-O1       | 1.865(3)                                            |
| Cu2-O2       | 1.871(3)                                            |
| O1-C30       | 1.263(6)                                            |
| O2-C30       | 1.272(6)                                            |
| Angles       |                                                     |
| C1-Cu1-O1    | 172.59(17)                                          |
| O2-Cu2-C16   | 172.25(17)                                          |
| N1-C15-N4    | 109.7(4)                                            |

Figure S7: ORTEP plot of [1]OTf. Hydrogen atoms, solvent molecules and counter ions are omitted for clarity. Thermal ellipsoids are shown at a probability level of 50%.

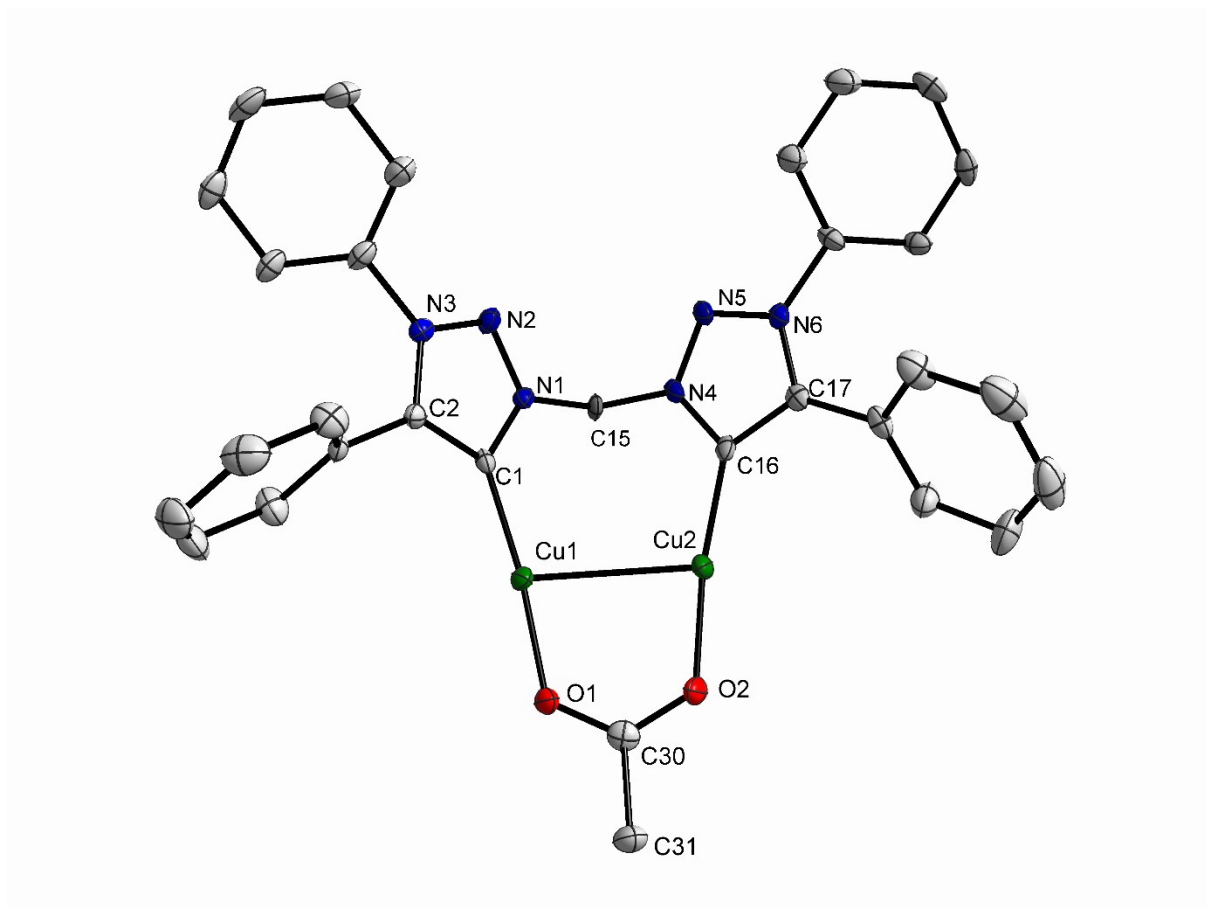

Figure S8: ORTEP representation of the unit cell of [1]OTf (view along a axis). Hydrogen atoms are omitted for clarity.

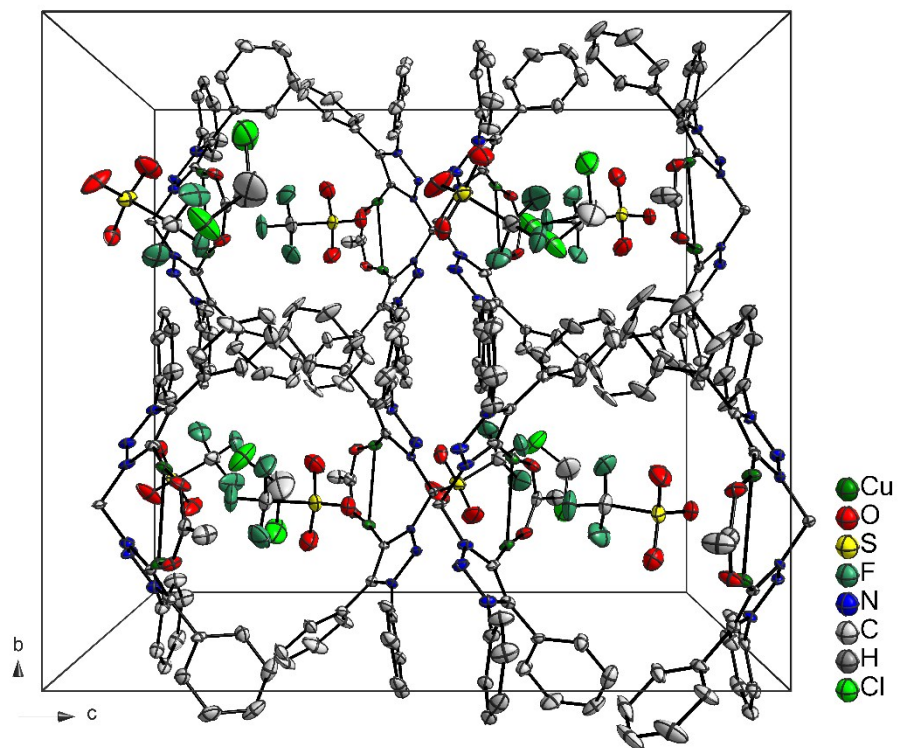



## Catalysis.

### Substrate Scope & Screening.

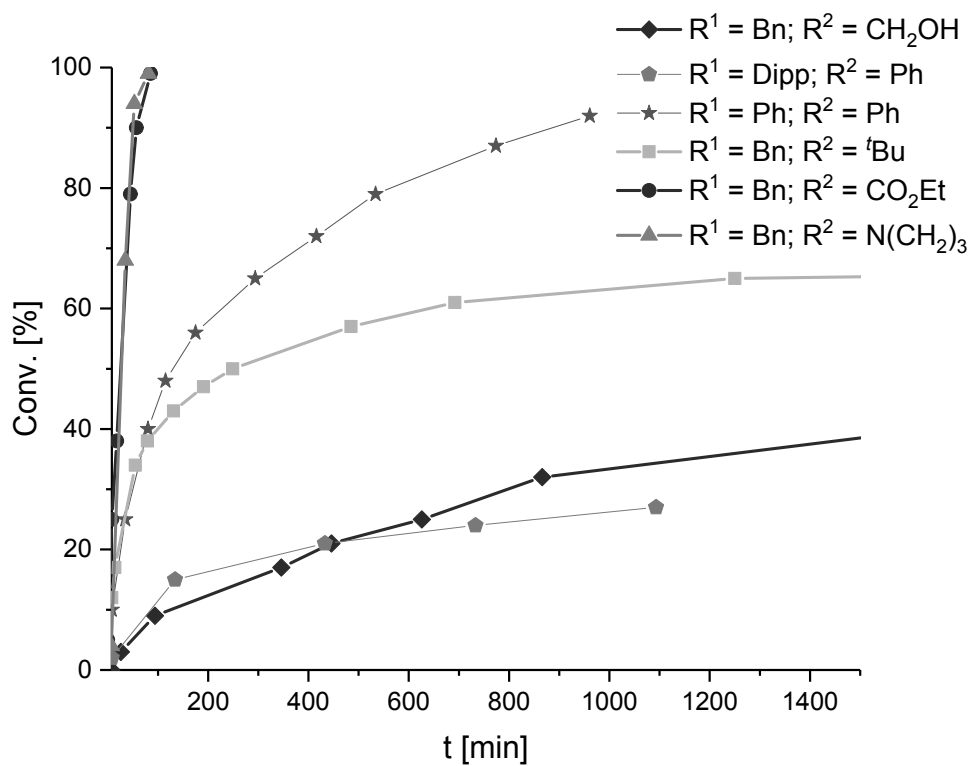

Figure S9: Conversion of the reaction vs. time.

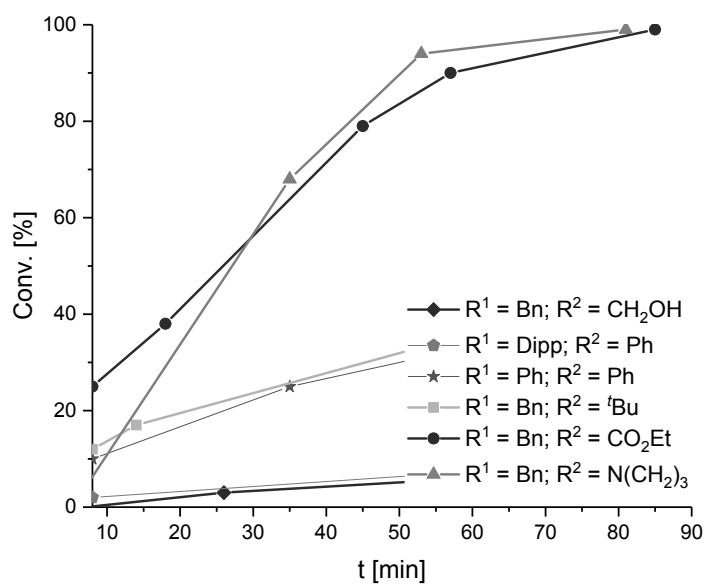

Figure S10: Conversion of the reaction vs. time (zoom).

**Rate low.**

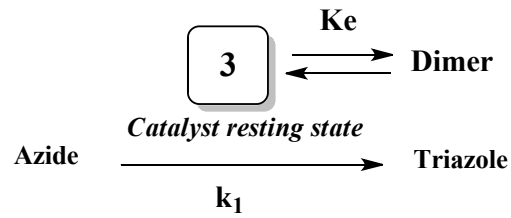

Equilibrium constant:

$$k_e = \frac{[Dimer]}{[3]^2}; [Dimer] = Ke.[3]^2$$

Conservation of the catalyst ( $C_0$  is the total amount of catalyst added in the reaction vessel):

$$C_0 = [3] + 2.[Dimer]$$

Thus:

$$2.Ke.[3]^2 + [3] - C_0 = 0$$

$$[3] = \frac{-1 + \sqrt{1 + 8.KeC_0}}{4.Ke}$$

The rate is:

$$v = -\frac{\partial[Azide]}{\partial t} = k_{obs}[Azide] = k.[3].[Azide] = k \cdot \frac{-1 + \sqrt{1 + 8.KeC_0}}{4.Ke} \cdot [Azide]$$

$$\frac{\partial[Azide]}{[Azide]} = -k \cdot \frac{-1 + \sqrt{1 + 8.KeC_0}}{4.Ke} \cdot \partial t$$

$$[Azide]_t = [Azide]_0 \cdot e^{-\left(k \cdot \frac{-1 + \sqrt{1 + 8.KeC_0}}{4.Ke}\right) \cdot t}$$

$$\text{With } k_{obs} = k \cdot \frac{-1 + \sqrt{1 + 8.KeC_0}}{4.Ke}$$

Remarks:

1– When  $K_e$  dominates:

$$v = k \cdot \frac{2 \cdot \sqrt{2 \cdot K_e C_0}}{4 \cdot K_e} \cdot [Azide] = k \cdot \frac{\sqrt{C_0}}{\sqrt{2 \cdot K_e}} \cdot [Azide] : \text{The catalyst order is 0.5.}$$

2– When  $K_e$  is small, using Taylor's formula ( $\sqrt{1+x} \approx 1 + x/2$ ):

$$v = k \cdot \frac{-1 + 1 + 4 \cdot K_e C_0}{4 \cdot K_e} \cdot [Azide] = k \cdot C_0 \cdot [Azide] : \text{The catalyst order is 1.}$$

## Re-calculation of the kinetics curves using calculated k and Ke values.

$[1]_0 = 1 \text{ mol-\%}$

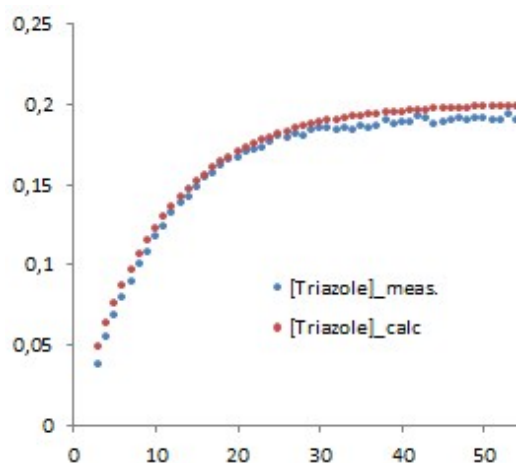

$[1]_0 = 0.5 \text{ mol-\%}$

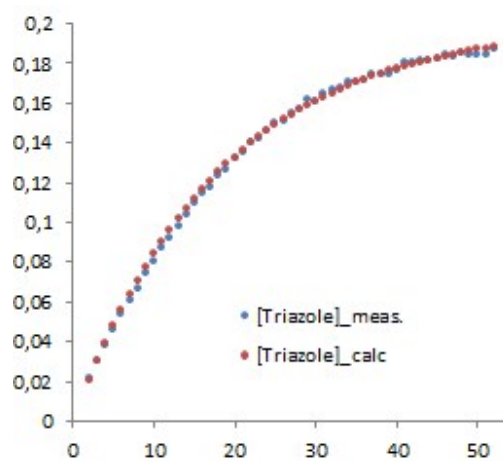

$[1]_0 = 0.31 \text{ mol-\%}$

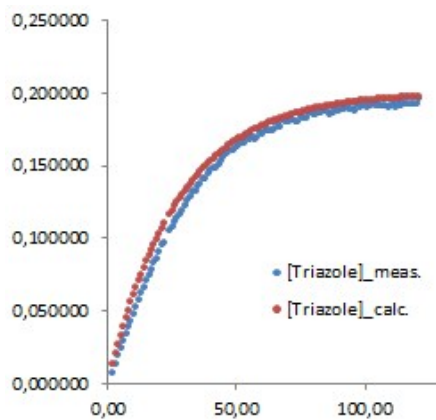

$[1]_0 = 0.15 \text{ mol-\%}$

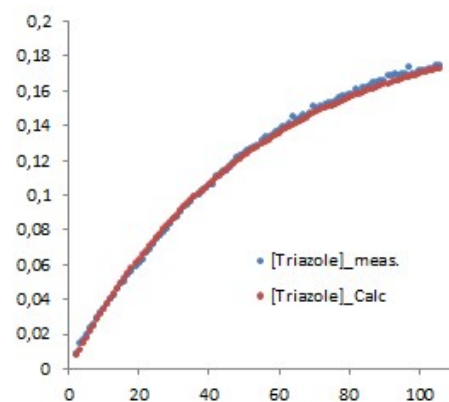

Figure S13: Comparison of calculated and measured values.
